# Supplementary material for: Extrusion of barley and oat influence the fecal microbiota and SCFA profile of growing pigs
Source: Royal Society of Chemistry journal article supplement (doi:10.1039/c5fo01452b), 2016-01-01
Supplement: c5fo01452b1.xlsx [file c5fo01452b1.xlsx]

## Sheet: groupmeans_pvalues
OTUid	M-B	M-O	p-grn	M-E	M-U	p-trt	M-BE	M-BU	M-OE	M-OU	p-int
14: G:Methanobrevibacter	0.0005 (0.0002)	0.0002 (0.0001)	0.269	0.0004 (0.0002)	0.0003 (0.0001)	0.5801	0.0006 (0.0005)	0.0004 (0.0002)	0.0003 (0.0002)	0.0001 (0.0001)	0.9718
112: D:Bacteria	0.0007 (0.0002)	0.0021 (0.0005)	0.0239	0.0016 (0.0006)	0.0011 (0.0003)	0.332	0.0005 (0.0003)	0.0008 (0.0003)	0.0027 (0.0008)	0.0014 (0.0006)	0.1506
244: D:Bacteria	0.0003 (0.0002)	0.0006 (0.0003)	0.4462	0.0005 (0.0002)	0.0003 (0.0003)	0.5605	0.0005 (0.0003)	0.0000 (0.0000)	0.0005 (0.0004)	0.0006 (0.0006)	0.4675
300: D:Bacteria	0.0003 (0.0001)	0.0004 (0.0003)	0.7676	0.0006 (0.0003)	0.0001 (0.0001)	0.1784	0.0004 (0.0003)	0.0002 (0.0001)	0.0008 (0.0007)	0.0000 (0.0000)	0.4137
322: D:Bacteria	0.0028 (0.0005)	0.0029 (0.0009)	0.9381	0.0030 (0.0009)	0.0027 (0.0006)	0.7934	0.0027 (0.0005)	0.0029 (0.0010)	0.0033 (0.0019)	0.0025 (0.0007)	0.6927
433: D:Bacteria	0.0086 (0.0020)	0.0072 (0.0007)	0.479	0.0061 (0.0011)	0.0097 (0.0016)	0.088	0.0055 (0.0019)	0.0118 (0.0030)	0.0068 (0.0013)	0.0076 (0.0007)	0.1812
516: D:Bacteria	0.0016 (0.0008)	0.0034 (0.0013)	0.2862	0.0027 (0.0013)	0.0023 (0.0009)	0.8419	0.0014 (0.0011)	0.0018 (0.0011)	0.0039 (0.0023)	0.0029 (0.0015)	0.6479
522: D:Bacteria	0.0008 (0.0003)	0.0013 (0.0006)	0.4	0.0006 (0.0004)	0.0015 (0.0006)	0.202	0.0008 (0.0007)	0.0007 (0.0003)	0.0004 (0.0004)	0.0022 (0.0010)	0.1562
616: D:Bacteria	0.0011 (0.0007)	0.0002 (0.0001)	0.2208	0.0010 (0.0007)	0.0003 (0.0001)	0.3434	0.0020 (0.0013)	0.0002 (0.0002)	0.0000 (0.0000)	0.0004 (0.0001)	0.1339
1110: D:Bacteria	0.0004 (0.0001)	0.0010 (0.0004)	0.1563	0.0004 (0.0002)	0.0011 (0.0003)	0.0894	0.0003 (0.0002)	0.0005 (0.0001)	0.0004 (0.0004)	0.0016 (0.0006)	0.2158
1137: D:Bacteria	0.0004 (0.0002)	0.0012 (0.0004)	0.1452	0.0008 (0.0004)	0.0008 (0.0003)	0.9011	0.0002 (0.0001)	0.0007 (0.0004)	0.0015 (0.0007)	0.0009 (0.0005)	0.2824
1562: D:Bacteria	0.0021 (0.0005)	0.0015 (0.0004)	0.3802	0.0017 (0.0005)	0.0019 (0.0004)	0.7688	0.0016 (0.0008)	0.0025 (0.0005)	0.0018 (0.0008)	0.0012 (0.0003)	0.2587
1568: D:Bacteria	0.0005 (0.0002)	0.0002 (0.0001)	0.1282	0.0002 (0.0002)	0.0005 (0.0002)	0.2545	0.0002 (0.0002)	0.0008 (0.0001)	0.0003 (0.0003)	0.0001 (0.0001)	0.1075
2022: D:Bacteria	0.0011 (0.0004)	0.0013 (0.0005)	0.7641	0.0014 (0.0005)	0.0010 (0.0003)	0.5072	0.0013 (0.0006)	0.0008 (0.0005)	0.0014 (0.0009)	0.0011 (0.0003)	0.9408
2087: D:Bacteria	0.0003 (0.0002)	0.0004 (0.0001)	0.756	0.0003 (0.0001)	0.0004 (0.0002)	0.8465	0.0003 (0.0003)	0.0004 (0.0003)	0.0004 (0.0001)	0.0004 (0.0003)	0.8514
2609: D:Bacteria	0.0011 (0.0003)	0.0011 (0.0004)	0.868	0.0009 (0.0003)	0.0013 (0.0003)	0.3657	0.0011 (0.0005)	0.0012 (0.0003)	0.0007 (0.0005)	0.0014 (0.0004)	0.4807
2669: D:Bacteria	0.0009 (0.0003)	0.0004 (0.0002)	0.1818	0.0003 (0.0001)	0.0010 (0.0003)	0.0402	0.0005 (0.0002)	0.0012 (0.0005)	0.0001 (0.0001)	0.0008 (0.0002)	0.9462
2699: D:Bacteria	0.0015 (0.0004)	0.0012 (0.0004)	0.6524	0.0015 (0.0004)	0.0011 (0.0005)	0.5367	0.0017 (0.0005)	0.0012 (0.0007)	0.0013 (0.0007)	0.0010 (0.0006)	0.8717
2734: D:Bacteria	0.0027 (0.0010)	0.0007 (0.0003)	0.1039	0.0016 (0.0005)	0.0018 (0.0011)	0.8891	0.0021 (0.0009)	0.0032 (0.0020)	0.0011 (0.0005)	0.0003 (0.0002)	0.4085
2963: D:Bacteria	0.0003 (0.0001)	0.0005 (0.0002)	0.4238	0.0002 (0.0001)	0.0005 (0.0002)	0.2811	0.0003 (0.0002)	0.0002 (0.0002)	0.0001 (0.0001)	0.0008 (0.0003)	0.132
3037: D:Bacteria	0.0011 (0.0006)	0.0009 (0.0005)	0.8088	0.0018 (0.0006)	0.0002 (0.0001)	0.0259	0.0018 (0.0010)	0.0004 (0.0003)	0.0019 (0.0007)	0.0000 (0.0000)	0.7009
3091: D:Bacteria	0.0015 (0.0005)	0.0022 (0.0006)	0.3646	0.0021 (0.0007)	0.0016 (0.0004)	0.5529	0.0013 (0.0008)	0.0018 (0.0006)	0.0030 (0.0010)	0.0015 (0.0006)	0.245
3104: D:Bacteria	0.0039 (0.0011)	0.0036 (0.0008)	0.8408	0.0031 (0.0011)	0.0043 (0.0008)	0.4358	0.0037 (0.0021)	0.0040 (0.0012)	0.0025 (0.0010)	0.0046 (0.0013)	0.5682
3205: D:Bacteria	0.0004 (0.0002)	0.0000 (0.0000)	0.0886	0.0002 (0.0001)	0.0002 (0.0002)	0.7712	0.0004 (0.0003)	0.0003 (0.0003)	0.0000 (0.0000)	0.0000 (0.0000)	0.7712
3216: D:Bacteria	0.0033 (0.0006)	0.0026 (0.0006)	0.4268	0.0027 (0.0006)	0.0031 (0.0007)	0.6649	0.0028 (0.0006)	0.0038 (0.0011)	0.0027 (0.0011)	0.0025 (0.0008)	0.5418
3271: D:Bacteria	0.0004 (0.0002)	0.0007 (0.0002)	0.3919	0.0004 (0.0002)	0.0006 (0.0002)	0.5361	0.0001 (0.0001)	0.0007 (0.0004)	0.0008 (0.0004)	0.0006 (0.0002)	0.2072
3323: D:Bacteria	0.0023 (0.0008)	0.0014 (0.0007)	0.374	0.0011 (0.0003)	0.0026 (0.0009)	0.1568	0.0018 (0.0003)	0.0029 (0.0016)	0.0004 (0.0003)	0.0024 (0.0013)	0.704
3337: D:Bacteria	0.0021 (0.0008)	0.0005 (0.0003)	0.1084	0.0012 (0.0006)	0.0013 (0.0007)	0.8764	0.0021 (0.0011)	0.0020 (0.0013)	0.0003 (0.0003)	0.0007 (0.0005)	0.7822
3402: D:Bacteria	0.0010 (0.0004)	0.0006 (0.0004)	0.4602	0.0010 (0.0005)	0.0005 (0.0002)	0.3871	0.0011 (0.0007)	0.0009 (0.0003)	0.0010 (0.0008)	0.0002 (0.0002)	0.6051
3442: D:Bacteria	0.0002 (0.0001)	0.0003 (0.0001)	0.3519	0.0002 (0.0001)	0.0003 (0.0001)	0.4285	0.0001 (0.0001)	0.0002 (0.0001)	0.0003 (0.0003)	0.0004 (0.0001)	0.9251
3747: D:Bacteria	0.0006 (0.0002)	0.0004 (0.0003)	0.4389	0.0005 (0.0003)	0.0005 (0.0002)	0.9923	0.0005 (0.0003)	0.0008 (0.0003)	0.0005 (0.0005)	0.0002 (0.0002)	0.3334
3853: D:Bacteria	0.0005 (0.0002)	0.0007 (0.0003)	0.6265	0.0008 (0.0003)	0.0004 (0.0002)	0.3159	0.0006 (0.0003)	0.0004 (0.0003)	0.0010 (0.0005)	0.0004 (0.0004)	0.7374
3892: D:Bacteria	0.0027 (0.0006)	0.0027 (0.0007)	0.9615	0.0014 (0.0006)	0.0040 (0.0004)	0.0035	0.0018 (0.0011)	0.0036 (0.0004)	0.0010 (0.0004)	0.0044 (0.0007)	0.2706
3912: D:Bacteria	0.0005 (0.0002)	0.0000 (0.0000)	0.0904	0.0003 (0.0002)	0.0002 (0.0001)	0.5775	0.0006 (0.0005)	0.0003 (0.0002)	0.0000 (0.0000)	0.0000 (0.0000)	0.5775
3956: D:Bacteria	0.0010 (0.0005)	0.0001 (0.0001)	0.1055	0.0007 (0.0005)	0.0005 (0.0003)	0.6086	0.0013 (0.0009)	0.0008 (0.0005)	0.0001 (0.0001)	0.0001 (0.0001)	0.5989
3967: D:Bacteria	0.0006 (0.0002)	0.0000 (0.0000)	0.0237	0.0002 (0.0001)	0.0004 (0.0003)	0.4147	0.0004 (0.0002)	0.0008 (0.0005)	0.0000 (0.0000)	0.0000 (0.0000)	0.4147
4066: D:Bacteria	0.0009 (0.0003)	0.0011 (0.0005)	0.6557	0.0003 (0.0002)	0.0017 (0.0004)	0.0036	0.0006 (0.0004)	0.0012 (0.0004)	0.0000 (0.0000)	0.0022 (0.0005)	0.0631
3663: G:Bifidobacterium	0.0021 (0.0008)	0.0039 (0.0020)	0.2799	0.0002 (0.0001)	0.0058 (0.0016)	0.0035	0.0003 (0.0001)	0.0039 (0.0010)	0.0000 (0.0000)	0.0078 (0.0030)	0.2065
134: P:Bacteroidetes	0.0005 (0.0002)	0.0005 (0.0003)	0.9173	0.0002 (0.0001)	0.0009 (0.0003)	0.0973	0.0001 (0.0001)	0.0009 (0.0003)	0.0003 (0.0002)	0.0008 (0.0006)	0.7477
442: P:Bacteroidetes	0.0020 (0.0004)	0.0011 (0.0004)	0.0954	0.0013 (0.0004)	0.0018 (0.0004)	0.4013	0.0021 (0.0005)	0.0019 (0.0006)	0.0005 (0.0002)	0.0016 (0.0007)	0.2286
444: P:Bacteroidetes	0.0009 (0.0003)	0.0003 (0.0002)	0.1368	0.0003 (0.0003)	0.0009 (0.0002)	0.1392	0.0006 (0.0005)	0.0011 (0.0004)	0.0000 (0.0000)	0.0006 (0.0003)	0.8319
546: P:Bacteroidetes	0.0029 (0.0010)	0.0022 (0.0007)	0.5676	0.0018 (0.0006)	0.0033 (0.0010)	0.2442	0.0025 (0.0010)	0.0034 (0.0019)	0.0011 (0.0007)	0.0033 (0.0011)	0.6161
605: P:Bacteroidetes	0.0003 (0.0002)	0.0001 (0.0001)	0.1944	0.0003 (0.0002)	0.0001 (0.0001)	0.1944	0.0006 (0.0003)	0.0000 (0.0000)	0.0000 (0.0000)	0.0001 (0.0001)	0.0541
606: P:Bacteroidetes	0.0020 (0.0004)	0.0017 (0.0004)	0.5678	0.0020 (0.0004)	0.0017 (0.0004)	0.6785	0.0021 (0.0003)	0.0020 (0.0008)	0.0019 (0.0009)	0.0015 (0.0001)	0.7683
898: P:Bacteroidetes	0.0010 (0.0003)	0.0003 (0.0003)	0.0939	0.0006 (0.0003)	0.0007 (0.0004)	0.9257	0.0013 (0.0004)	0.0008 (0.0006)	0.0000 (0.0000)	0.0005 (0.0005)	0.2965
1173: P:Bacteroidetes	0.0004 (0.0002)	0.0001 (0.0001)	0.1874	0.0001 (0.0001)	0.0003 (0.0002)	0.3365	0.0002 (0.0001)	0.0005 (0.0004)	0.0000 (0.0000)	0.0001 (0.0001)	0.7058
1433: P:Bacteroidetes	0.0011 (0.0004)	0.0011 (0.0005)	0.986	0.0004 (0.0002)	0.0018 (0.0005)	0.0318	0.0005 (0.0003)	0.0017 (0.0008)	0.0003 (0.0003)	0.0019 (0.0007)	0.6974
1479: P:Bacteroidetes	0.0023 (0.0005)	0.0005 (0.0003)	0.0061	0.0009 (0.0004)	0.0019 (0.0006)	0.0844	0.0016 (0.0005)	0.0030 (0.0007)	0.0001 (0.0001)	0.0008 (0.0006)	0.5454
2003: P:Bacteroidetes	0.0018 (0.0004)	0.0017 (0.0007)	0.8698	0.0021 (0.0007)	0.0014 (0.0003)	0.3508	0.0024 (0.0005)	0.0012 (0.0005)	0.0018 (0.0013)	0.0015 (0.0005)	0.5914
2192: P:Bacteroidetes	0.0016 (0.0002)	0.0001 (0.0001)	0	0.0009 (0.0003)	0.0008 (0.0003)	0.4553	0.0017 (0.0001)	0.0015 (0.0004)	0.0001 (0.0001)	0.0000 (0.0000)	0.8917
2287: P:Bacteroidetes	0.0019 (0.0006)	0.0013 (0.0009)	0.5821	0.0023 (0.0010)	0.0009 (0.0003)	0.214	0.0024 (0.0012)	0.0014 (0.0004)	0.0022 (0.0017)	0.0003 (0.0003)	0.6799
2755: P:Bacteroidetes	0.0011 (0.0003)	0.0006 (0.0002)	0.2881	0.0007 (0.0002)	0.0010 (0.0003)	0.311	0.0008 (0.0003)	0.0013 (0.0005)	0.0005 (0.0004)	0.0008 (0.0004)	0.6752
3405: P:Bacteroidetes	0.0019 (0.0007)	0.0058 (0.0019)	0.0828	0.0044 (0.0020)	0.0034 (0.0010)	0.6318	0.0011 (0.0005)	0.0028 (0.0013)	0.0076 (0.0035)	0.0040 (0.0017)	0.2194
3595: P:Bacteroidetes	0.0009 (0.0003)	0.0002 (0.0001)	0.0338	0.0002 (0.0001)	0.0009 (0.0003)	0.0335	0.0005 (0.0003)	0.0013 (0.0005)	0.0000 (0.0000)	0.0005 (0.0002)	0.4737
3602: P:Bacteroidetes	0.0003 (0.0002)	0.0001 (0.0001)	0.4329	0.0001 (0.0001)	0.0003 (0.0002)	0.3708	0.0001 (0.0001)	0.0005 (0.0004)	0.0001 (0.0001)	0.0001 (0.0001)	0.377
3832: P:Bacteroidetes	0.0005 (0.0002)	0.0001 (0.0001)	0.1532	0.0001 (0.0001)	0.0005 (0.0002)	0.1583	0.0003 (0.0003)	0.0006 (0.0003)	0.0000 (0.0000)	0.0003 (0.0002)	0.8746
3910: P:Bacteroidetes	0.0021 (0.0004)	0.0013 (0.0005)	0.2073	0.0019 (0.0005)	0.0014 (0.0005)	0.437	0.0017 (0.0007)	0.0025 (0.0005)	0.0021 (0.0008)	0.0004 (0.0003)	0.0615
3963: P:Bacteroidetes	0.0007 (0.0003)	0.0008 (0.0002)	0.8699	0.0007 (0.0002)	0.0007 (0.0004)	0.9115	0.0004 (0.0002)	0.0009 (0.0007)	0.0011 (0.0004)	0.0004 (0.0003)	0.1971
1390: O:Bacteroidales	0.0005 (0.0002)	0.0004 (0.0002)	0.7326	0.0004 (0.0002)	0.0005 (0.0002)	0.5927	0.0002 (0.0001)	0.0008 (0.0003)	0.0006 (0.0004)	0.0003 (0.0002)	0.1479
3349: O:Bacteroidales	0.0004 (0.0001)	0.0007 (0.0002)	0.2971	0.0003 (0.0001)	0.0008 (0.0001)	0.0449	0.0002 (0.0001)	0.0006 (0.0002)	0.0004 (0.0003)	0.0009 (0.0002)	0.8175
3364: O:Bacteroidales	0.0008 (0.0004)	0.0034 (0.0008)	0.0195	0.0016 (0.0009)	0.0026 (0.0007)	0.3219	0.0002 (0.0002)	0.0014 (0.0006)	0.0030 (0.0015)	0.0037 (0.0010)	0.786
3633: O:Bacteroidales	0.0008 (0.0003)	0.0010 (0.0004)	0.6381	0.0012 (0.0004)	0.0006 (0.0003)	0.2302	0.0011 (0.0006)	0.0005 (0.0002)	0.0013 (0.0005)	0.0007 (0.0006)	0.9973
1037: F:Porphyromonadaceae	0.0005 (0.0003)	0.0002 (0.0001)	0.1919	0.0005 (0.0003)	0.0002 (0.0001)	0.2824	0.0009 (0.0005)	0.0002 (0.0001)	0.0001 (0.0001)	0.0002 (0.0002)	0.2369
205: G:Parabacteroides	0.0012 (0.0004)	0.0007 (0.0003)	0.3335	0.0008 (0.0004)	0.0011 (0.0003)	0.6221	0.0013 (0.0007)	0.0011 (0.0003)	0.0004 (0.0003)	0.0010 (0.0005)	0.457
270: G:Prevotella	0.0010 (0.0003)	0.0019 (0.0006)	0.1638	0.0009 (0.0003)	0.0020 (0.0006)	0.127	0.0006 (0.0003)	0.0013 (0.0005)	0.0012 (0.0004)	0.0026 (0.0011)	0.5671
391: G:Prevotella	0.0046 (0.0012)	0.0048 (0.0014)	0.898	0.0053 (0.0013)	0.0042 (0.0013)	0.5763	0.0042 (0.0018)	0.0049 (0.0018)	0.0063 (0.0020)	0.0034 (0.0021)	0.3588
418: G:Prevotella	0.0005 (0.0002)	0.0012 (0.0008)	0.4295	0.0014 (0.0008)	0.0003 (0.0001)	0.2222	0.0008 (0.0004)	0.0002 (0.0001)	0.0020 (0.0016)	0.0004 (0.0003)	0.5913
1394: G:Prevotella	0.0103 (0.0021)	0.0077 (0.0016)	0.3464	0.0086 (0.0019)	0.0093 (0.0020)	0.7932	0.0082 (0.0033)	0.0124 (0.0028)	0.0090 (0.0025)	0.0063 (0.0021)	0.2304
2226: G:Prevotella	0.0043 (0.0008)	0.0028 (0.0007)	0.187	0.0031 (0.0008)	0.0040 (0.0008)	0.4479	0.0038 (0.0011)	0.0049 (0.0012)	0.0024 (0.0013)	0.0031 (0.0010)	0.8424
2379: G:Prevotella	0.0014 (0.0002)	0.0007 (0.0003)	0.0993	0.0010 (0.0002)	0.0011 (0.0003)	0.7182	0.0014 (0.0002)	0.0013 (0.0004)	0.0006 (0.0002)	0.0009 (0.0005)	0.5459
2799: G:Prevotella	0.0002 (0.0001)	0.0004 (0.0002)	0.2329	0.0003 (0.0001)	0.0003 (0.0001)	0.8008	0.0001 (0.0001)	0.0002 (0.0001)	0.0004 (0.0003)	0.0004 (0.0003)	0.8277
814: P:Firmicutes	0.0011 (0.0003)	0.0010 (0.0004)	0.9275	0.0008 (0.0003)	0.0013 (0.0004)	0.2863	0.0011 (0.0005)	0.0011 (0.0004)	0.0005 (0.0003)	0.0016 (0.0006)	0.3122
952: P:Firmicutes	0.0004 (0.0001)	0.0015 (0.0006)	0.1193	0.0013 (0.0006)	0.0006 (0.0004)	0.3581	0.0005 (0.0002)	0.0003 (0.0002)	0.0020 (0.0011)	0.0010 (0.0007)	0.5614
1008: P:Firmicutes	0.0016 (0.0003)	0.0011 (0.0002)	0.3211	0.0014 (0.0004)	0.0013 (0.0002)	0.8548	0.0019 (0.0007)	0.0013 (0.0002)	0.0010 (0.0004)	0.0013 (0.0004)	0.2963
1091: P:Firmicutes	0.0008 (0.0002)	0.0014 (0.0002)	0.0822	0.0011 (0.0002)	0.0012 (0.0003)	0.6872	0.0011 (0.0002)	0.0006 (0.0004)	0.0011 (0.0002)	0.0018 (0.0003)	0.0944
1169: P:Firmicutes	0.0008 (0.0002)	0.0011 (0.0003)	0.3456	0.0009 (0.0002)	0.0009 (0.0002)	0.9904	0.0008 (0.0004)	0.0007 (0.0002)	0.0011 (0.0004)	0.0012 (0.0004)	0.7956
1889: P:Firmicutes	0.0009 (0.0003)	0.0004 (0.0001)	0.1075	0.0004 (0.0002)	0.0009 (0.0002)	0.1267	0.0008 (0.0002)	0.0011 (0.0005)	0.0001 (0.0001)	0.0007 (0.0001)	0.6533
2798: P:Firmicutes	0.0008 (0.0003)	0.0010 (0.0004)	0.6297	0.0015 (0.0004)	0.0003 (0.0001)	0.0293	0.0014 (0.0005)	0.0002 (0.0001)	0.0016 (0.0008)	0.0004 (0.0001)	0.9248
2812: P:Firmicutes	0.0102 (0.0028)	0.0126 (0.0018)	0.2556	0.0073 (0.0021)	0.0155 (0.0014)	0.0015	0.0031 (0.0006)	0.0172 (0.0015)	0.0114 (0.0029)	0.0138 (0.0023)	0.0142
3255: P:Firmicutes	0.0005 (0.0003)	0.0008 (0.0002)	0.4426	0.0003 (0.0002)	0.0009 (0.0003)	0.1339	0.0002 (0.0002)	0.0007 (0.0006)	0.0004 (0.0003)	0.0011 (0.0004)	0.7937
3637: P:Firmicutes	0.0019 (0.0007)	0.0056 (0.0018)	0.0498	0.0024 (0.0007)	0.0051 (0.0019)	0.1342	0.0024 (0.0012)	0.0015 (0.0008)	0.0024 (0.0010)	0.0087 (0.0028)	0.0518
2317: G:Lactobacillus	0.0008 (0.0002)	0.0012 (0.0004)	0.3466	0.0014 (0.0004)	0.0006 (0.0003)	0.1098	0.0013 (0.0003)	0.0003 (0.0002)	0.0015 (0.0007)	0.0009 (0.0004)	0.673
3231: G:Lactobacillus	0.0059 (0.0027)	0.0056 (0.0024)	0.9121	0.0014 (0.0006)	0.0101 (0.0027)	0.013	0.0021 (0.0011)	0.0097 (0.0049)	0.0007 (0.0004)	0.0105 (0.0031)	0.7133
692: G:Streptococcus	0.0003 (0.0002)	0.0003 (0.0001)	0.7293	0.0004 (0.0001)	0.0002 (0.0001)	0.22	0.0003 (0.0002)	0.0004 (0.0003)	0.0006 (0.0002)	0.0000 (0.0000)	0.1705
2901: G:Streptococcus	0.0479 (0.0155)	0.0878 (0.0176)	0.0472	0.0985 (0.0177)	0.0372 (0.0091)	0.0053	0.0768 (0.0217)	0.0190 (0.0098)	0.1203 (0.0259)	0.0554 (0.0082)	0.849
816: C:Clostridia	0.0006 (0.0002)	0.0005 (0.0003)	0.7287	0.0006 (0.0004)	0.0005 (0.0001)	0.8457	0.0005 (0.0003)	0.0008 (0.0001)	0.0007 (0.0007)	0.0003 (0.0002)	0.3951
1103: C:Clostridia	0.0006 (0.0002)	0.0013 (0.0003)	0.0867	0.0012 (0.0002)	0.0007 (0.0003)	0.2512	0.0009 (0.0002)	0.0004 (0.0004)	0.0015 (0.0004)	0.0011 (0.0004)	0.927
1547: C:Clostridia	0.0019 (0.0004)	0.0014 (0.0007)	0.5568	0.0007 (0.0003)	0.0026 (0.0006)	0.0273	0.0011 (0.0006)	0.0027 (0.0003)	0.0004 (0.0003)	0.0024 (0.0013)	0.7574
3764: C:Clostridia	0.0002 (0.0001)	0.0002 (0.0002)	0.9447	0.0002 (0.0002)	0.0002 (0.0001)	0.9447	0.0000 (0.0000)	0.0004 (0.0002)	0.0004 (0.0004)	0.0000 (0.0000)	0.0949
8: O:Clostridiales	0.0003 (0.0001)	0.0014 (0.0005)	0.0615	0.0006 (0.0002)	0.0012 (0.0005)	0.2699	0.0002 (0.0002)	0.0005 (0.0002)	0.0010 (0.0003)	0.0019 (0.0010)	0.5323
178: O:Clostridiales	0.0004 (0.0002)	0.0006 (0.0003)	0.4344	0.0007 (0.0003)	0.0003 (0.0002)	0.2956	0.0002 (0.0002)	0.0005 (0.0003)	0.0011 (0.0005)	0.0001 (0.0001)	0.0877
245: O:Clostridiales	0.0004 (0.0001)	0.0009 (0.0002)	0.105	0.0006 (0.0002)	0.0007 (0.0001)	0.9212	0.0003 (0.0001)	0.0006 (0.0002)	0.0010 (0.0004)	0.0007 (0.0001)	0.3062
259: O:Clostridiales	0.0020 (0.0009)	0.0027 (0.0008)	0.6008	0.0027 (0.0011)	0.0021 (0.0003)	0.6308	0.0020 (0.0017)	0.0020 (0.0007)	0.0033 (0.0017)	0.0021 (0.0002)	0.6331
319: O:Clostridiales	0.0039 (0.0023)	0.0035 (0.0012)	0.8691	0.0020 (0.0007)	0.0054 (0.0023)	0.2095	0.0022 (0.0011)	0.0056 (0.0045)	0.0018 (0.0009)	0.0052 (0.0019)	0.9973
507: O:Clostridiales	0.0003 (0.0001)	0.0007 (0.0004)	0.2852	0.0003 (0.0002)	0.0007 (0.0003)	0.3741	0.0002 (0.0001)	0.0003 (0.0002)	0.0004 (0.0004)	0.0010 (0.0006)	0.5341
540: O:Clostridiales	0.0036 (0.0008)	0.0025 (0.0007)	0.2443	0.0034 (0.0008)	0.0027 (0.0006)	0.475	0.0049 (0.0012)	0.0023 (0.0004)	0.0019 (0.0007)	0.0031 (0.0011)	0.0644
611: O:Clostridiales	0.0324 (0.0052)	0.0196 (0.0034)	0.0655	0.0296 (0.0056)	0.0224 (0.0039)	0.2771	0.0380 (0.0088)	0.0267 (0.0053)	0.0211 (0.0046)	0.0180 (0.0056)	0.5299
742: O:Clostridiales	0.0024 (0.0006)	0.0026 (0.0006)	0.791	0.0024 (0.0005)	0.0026 (0.0006)	0.8553	0.0021 (0.0006)	0.0026 (0.0011)	0.0027 (0.0009)	0.0025 (0.0007)	0.6661
829: O:Clostridiales	0.0031 (0.0007)	0.0011 (0.0002)	0.0196	0.0022 (0.0005)	0.0020 (0.0008)	0.8289	0.0032 (0.0007)	0.0031 (0.0013)	0.0012 (0.0001)	0.0009 (0.0004)	0.8799
904: O:Clostridiales	0.0021 (0.0005)	0.0008 (0.0003)	0.0517	0.0010 (0.0004)	0.0019 (0.0006)	0.1905	0.0019 (0.0003)	0.0023 (0.0011)	0.0001 (0.0001)	0.0015 (0.0003)	0.4363
960: O:Clostridiales	0.0007 (0.0002)	0.0001 (0.0001)	0.0231	0.0005 (0.0002)	0.0002 (0.0002)	0.175	0.0010 (0.0003)	0.0004 (0.0003)	0.0001 (0.0001)	0.0000 (0.0000)	0.3879
1011: O:Clostridiales	0.0044 (0.0011)	0.0036 (0.0007)	0.5438	0.0043 (0.0008)	0.0037 (0.0010)	0.6816	0.0040 (0.0013)	0.0048 (0.0018)	0.0045 (0.0012)	0.0027 (0.0006)	0.3445
1142: O:Clostridiales	0.0038 (0.0006)	0.0031 (0.0006)	0.4662	0.0037 (0.0005)	0.0032 (0.0007)	0.5278	0.0033 (0.0005)	0.0043 (0.0012)	0.0042 (0.0009)	0.0021 (0.0004)	0.0888
1154: O:Clostridiales	0.0002 (0.0001)	0.0003 (0.0002)	0.6479	0.0000 (0.0000)	0.0005 (0.0001)	0.013	0.0001 (0.0001)	0.0003 (0.0001)	0.0000 (0.0000)	0.0006 (0.0002)	0.2748
1161: O:Clostridiales	0.0025 (0.0005)	0.0023 (0.0005)	0.818	0.0021 (0.0005)	0.0028 (0.0005)	0.3571	0.0023 (0.0007)	0.0027 (0.0008)	0.0019 (0.0007)	0.0028 (0.0006)	0.7596
1299: O:Clostridiales	0.0004 (0.0002)	0.0028 (0.0027)	0.3788	0.0003 (0.0002)	0.0029 (0.0027)	0.3575	0.0003 (0.0002)	0.0004 (0.0003)	0.0003 (0.0003)	0.0054 (0.0054)	0.3667
1413: O:Clostridiales	0.0030 (0.0004)	0.0030 (0.0005)	0.904	0.0030 (0.0004)	0.0030 (0.0004)	0.8895	0.0024 (0.0005)	0.0036 (0.0005)	0.0035 (0.0006)	0.0025 (0.0006)	0.0775
1443: O:Clostridiales	0.0014 (0.0005)	0.0026 (0.0008)	0.2146	0.0010 (0.0003)	0.0030 (0.0008)	0.0354	0.0006 (0.0004)	0.0023 (0.0009)	0.0014 (0.0006)	0.0037 (0.0013)	0.7074
1493: O:Clostridiales	0.0008 (0.0003)	0.0006 (0.0002)	0.6314	0.0010 (0.0002)	0.0004 (0.0002)	0.1133	0.0011 (0.0004)	0.0004 (0.0003)	0.0008 (0.0003)	0.0004 (0.0003)	0.6359
1501: O:Clostridiales	0.0025 (0.0014)	0.0030 (0.0022)	0.8603	0.0029 (0.0022)	0.0027 (0.0014)	0.9402	0.0012 (0.0003)	0.0039 (0.0027)	0.0046 (0.0046)	0.0015 (0.0011)	0.3087
1525: O:Clostridiales	0.0043 (0.0009)	0.0038 (0.0011)	0.7808	0.0048 (0.0012)	0.0033 (0.0007)	0.3118	0.0050 (0.0015)	0.0035 (0.0012)	0.0046 (0.0020)	0.0031 (0.0010)	0.9896
1538: O:Clostridiales	0.0007 (0.0002)	0.0004 (0.0002)	0.3298	0.0005 (0.0003)	0.0005 (0.0002)	0.8073	0.0006 (0.0004)	0.0008 (0.0001)	0.0005 (0.0004)	0.0002 (0.0002)	0.3604
1672: O:Clostridiales	0.0005 (0.0001)	0.0003 (0.0001)	0.2105	0.0004 (0.0001)	0.0004 (0.0001)	0.8299	0.0005 (0.0001)	0.0004 (0.0002)	0.0003 (0.0002)	0.0003 (0.0002)	0.6293
1713: O:Clostridiales	0.0010 (0.0002)	0.0010 (0.0003)	0.93	0.0015 (0.0002)	0.0005 (0.0002)	0.0088	0.0015 (0.0002)	0.0005 (0.0001)	0.0015 (0.0005)	0.0005 (0.0003)	0.9454
1726: O:Clostridiales	0.0044 (0.0008)	0.0035 (0.0007)	0.3616	0.0044 (0.0009)	0.0035 (0.0006)	0.3489	0.0058 (0.0011)	0.0030 (0.0003)	0.0031 (0.0010)	0.0039 (0.0012)	0.0908
1747: O:Clostridiales	0.0010 (0.0005)	0.0008 (0.0003)	0.7684	0.0012 (0.0006)	0.0006 (0.0002)	0.3728	0.0012 (0.0011)	0.0008 (0.0003)	0.0012 (0.0006)	0.0004 (0.0002)	0.8157
1829: O:Clostridiales	0.0006 (0.0002)	0.0005 (0.0002)	0.7742	0.0004 (0.0002)	0.0006 (0.0002)	0.4608	0.0004 (0.0003)	0.0007 (0.0003)	0.0004 (0.0001)	0.0006 (0.0004)	0.8425
1847: O:Clostridiales	0.0006 (0.0002)	0.0005 (0.0003)	0.9411	0.0008 (0.0003)	0.0003 (0.0001)	0.1508	0.0005 (0.0004)	0.0006 (0.0002)	0.0011 (0.0005)	0.0000 (0.0000)	0.0785
2004: O:Clostridiales	0.0002 (0.0001)	0.0001 (0.0001)	0.3554	0.0002 (0.0001)	0.0001 (0.0001)	0.7953	0.0003 (0.0002)	0.0001 (0.0001)	0.0000 (0.0000)	0.0001 (0.0001)	0.1988
2066: O:Clostridiales	0.0002 (0.0001)	0.0003 (0.0001)	0.4454	0.0001 (0.0001)	0.0005 (0.0001)	0.0041	0.0001 (0.0001)	0.0003 (0.0002)	0.0000 (0.0000)	0.0006 (0.0000)	0.1104
2089: O:Clostridiales	0.0058 (0.0009)	0.0044 (0.0011)	0.3136	0.0042 (0.0008)	0.0060 (0.0012)	0.234	0.0040 (0.0005)	0.0076 (0.0013)	0.0044 (0.0017)	0.0043 (0.0017)	0.209
2286: O:Clostridiales	0.0009 (0.0004)	0.0006 (0.0002)	0.4332	0.0004 (0.0002)	0.0010 (0.0004)	0.1837	0.0002 (0.0001)	0.0016 (0.0007)	0.0007 (0.0003)	0.0005 (0.0002)	0.0689
2343: O:Clostridiales	0.0004 (0.0001)	0.0006 (0.0002)	0.4955	0.0006 (0.0001)	0.0004 (0.0002)	0.715	0.0006 (0.0002)	0.0002 (0.0001)	0.0005 (0.0002)	0.0007 (0.0005)	0.4589
2414: O:Clostridiales	0.0013 (0.0003)	0.0012 (0.0003)	0.7759	0.0015 (0.0003)	0.0009 (0.0002)	0.177	0.0014 (0.0006)	0.0012 (0.0004)	0.0016 (0.0004)	0.0007 (0.0001)	0.4514
2538: O:Clostridiales	0.0032 (0.0010)	0.0019 (0.0008)	0.2548	0.0040 (0.0010)	0.0011 (0.0003)	0.0221	0.0049 (0.0016)	0.0015 (0.0005)	0.0031 (0.0014)	0.0007 (0.0004)	0.6305
2733: O:Clostridiales	0.0009 (0.0003)	0.0016 (0.0008)	0.424	0.0018 (0.0008)	0.0006 (0.0003)	0.1566	0.0010 (0.0004)	0.0008 (0.0005)	0.0027 (0.0015)	0.0004 (0.0003)	0.2426
2753: O:Clostridiales	0.0005 (0.0002)	0.0012 (0.0010)	0.4894	0.0014 (0.0009)	0.0003 (0.0002)	0.2841	0.0008 (0.0003)	0.0003 (0.0003)	0.0021 (0.0019)	0.0003 (0.0003)	0.5309
2855: O:Clostridiales	0.0004 (0.0002)	0.0009 (0.0005)	0.3284	0.0002 (0.0001)	0.0010 (0.0005)	0.1258	0.0001 (0.0001)	0.0006 (0.0003)	0.0003 (0.0002)	0.0015 (0.0010)	0.509
2878: O:Clostridiales	0.0004 (0.0001)	0.0003 (0.0002)	0.452	0.0003 (0.0001)	0.0004 (0.0002)	0.8781	0.0004 (0.0002)	0.0005 (0.0002)	0.0003 (0.0002)	0.0003 (0.0003)	0.9743
2921: O:Clostridiales	0.0003 (0.0001)	0.0006 (0.0003)	0.2842	0.0003 (0.0003)	0.0005 (0.0002)	0.4974	0.0000 (0.0000)	0.0005 (0.0002)	0.0007 (0.0005)	0.0006 (0.0003)	0.3345
2973: O:Clostridiales	0.0003 (0.0001)	0.0006 (0.0002)	0.2121	0.0005 (0.0002)	0.0004 (0.0002)	0.7232	0.0002 (0.0001)	0.0003 (0.0002)	0.0007 (0.0003)	0.0004 (0.0003)	0.4423
3146: O:Clostridiales	0.0008 (0.0005)	0.0013 (0.0006)	0.4789	0.0003 (0.0003)	0.0019 (0.0006)	0.0389	0.0000 (0.0000)	0.0016 (0.0008)	0.0005 (0.0005)	0.0021 (0.0010)	0.9813
3429: O:Clostridiales	0.0004 (0.0002)	0.0004 (0.0003)	0.8221	0.0001 (0.0001)	0.0007 (0.0003)	0.1069	0.0002 (0.0001)	0.0007 (0.0004)	0.0000 (0.0000)	0.0007 (0.0006)	0.7018
3452: O:Clostridiales	0.0008 (0.0003)	0.0003 (0.0002)	0.1877	0.0006 (0.0001)	0.0006 (0.0004)	0.9107	0.0005 (0.0001)	0.0011 (0.0006)	0.0007 (0.0003)	0.0000 (0.0000)	0.091
3455: O:Clostridiales	0.0010 (0.0004)	0.0028 (0.0006)	0.0081	0.0010 (0.0006)	0.0027 (0.0004)	0.0111	0.0000 (0.0000)	0.0019 (0.0004)	0.0020 (0.0010)	0.0036 (0.0003)	0.7731
3472: O:Clostridiales	0.0005 (0.0003)	0.0001 (0.0001)	0.2067	0.0005 (0.0003)	0.0001 (0.0001)	0.1607	0.0009 (0.0005)	0.0001 (0.0001)	0.0001 (0.0001)	0.0001 (0.0001)	0.1608
3535: O:Clostridiales	0.0050 (0.0008)	0.0041 (0.0009)	0.4301	0.0057 (0.0009)	0.0034 (0.0005)	0.0416	0.0055 (0.0015)	0.0044 (0.0003)	0.0059 (0.0012)	0.0024 (0.0005)	0.2586
3679: O:Clostridiales	0.0004 (0.0002)	0.0001 (0.0001)	0.1459	0.0003 (0.0001)	0.0003 (0.0002)	0.8575	0.0003 (0.0002)	0.0005 (0.0003)	0.0003 (0.0002)	0.0000 (0.0000)	0.2206
3792: O:Clostridiales	0.0003 (0.0002)	0.0005 (0.0002)	0.6178	0.0003 (0.0002)	0.0005 (0.0002)	0.6717	0.0003 (0.0003)	0.0004 (0.0003)	0.0004 (0.0003)	0.0006 (0.0004)	0.9072
3803: O:Clostridiales	0.0004 (0.0002)	0.0003 (0.0001)	0.6917	0.0003 (0.0001)	0.0005 (0.0002)	0.4365	0.0003 (0.0002)	0.0005 (0.0003)	0.0003 (0.0002)	0.0004 (0.0003)	0.8719
3873: O:Clostridiales	0.0004 (0.0002)	0.0001 (0.0001)	0.1163	0.0003 (0.0001)	0.0003 (0.0001)	0.6597	0.0005 (0.0002)	0.0004 (0.0002)	0.0000 (0.0000)	0.0003 (0.0002)	0.3051
3916: O:Clostridiales	0.0016 (0.0003)	0.0014 (0.0003)	0.8265	0.0016 (0.0002)	0.0014 (0.0004)	0.7842	0.0015 (0.0001)	0.0016 (0.0007)	0.0016 (0.0005)	0.0013 (0.0005)	0.6592
3961: O:Clostridiales	0.0209 (0.0011)	0.0189 (0.0025)	0.4774	0.0194 (0.0019)	0.0205 (0.0021)	0.7132	0.0221 (0.0008)	0.0198 (0.0020)	0.0167 (0.0033)	0.0211 (0.0040)	0.2505
4075: O:Clostridiales	0.0020 (0.0003)	0.0015 (0.0003)	0.3356	0.0017 (0.0003)	0.0018 (0.0004)	0.9099	0.0017 (0.0004)	0.0022 (0.0005)	0.0017 (0.0004)	0.0013 (0.0005)	0.2725
4098: O:Clostridiales	0.0002 (0.0001)	0.0007 (0.0004)	0.3331	0.0005 (0.0004)	0.0004 (0.0003)	0.8106	0.0003 (0.0002)	0.0002 (0.0002)	0.0008 (0.0008)	0.0007 (0.0005)	0.9981
4107: O:Clostridiales	0.0032 (0.0006)	0.0027 (0.0009)	0.6756	0.0035 (0.0008)	0.0024 (0.0007)	0.2965	0.0032 (0.0005)	0.0032 (0.0012)	0.0039 (0.0015)	0.0016 (0.0006)	0.2994
1555: F:Clostridiaceae	0.0003 (0.0001)	0.0003 (0.0001)	0.9772	0.0002 (0.0001)	0.0003 (0.0001)	0.5589	0.0003 (0.0001)	0.0002 (0.0001)	0.0001 (0.0001)	0.0004 (0.0003)	0.3187
1819: F:Clostridiaceae	0.0015 (0.0003)	0.0018 (0.0003)	0.6198	0.0018 (0.0003)	0.0015 (0.0004)	0.5395	0.0017 (0.0006)	0.0013 (0.0005)	0.0019 (0.0001)	0.0017 (0.0007)	0.82
3052: F:Clostridiaceae	0.0002 (0.0001)	0.0002 (0.0001)	0.9625	0.0002 (0.0001)	0.0002 (0.0001)	0.7536	0.0003 (0.0001)	0.0001 (0.0001)	0.0001 (0.0001)	0.0003 (0.0003)	0.2961
1114: G:Clostridium	0.0009 (0.0002)	0.0001 (0.0001)	0.0168	0.0005 (0.0002)	0.0006 (0.0002)	0.7945	0.0007 (0.0004)	0.0011 (0.0003)	0.0003 (0.0003)	0.0000 (0.0000)	0.258
2828: G:Clostridium	0.0008 (0.0002)	0.0003 (0.0002)	0.1483	0.0006 (0.0003)	0.0006 (0.0002)	0.9039	0.0010 (0.0004)	0.0006 (0.0002)	0.0001 (0.0001)	0.0005 (0.0004)	0.162
3346: G:Clostridium	0.0009 (0.0004)	0.0006 (0.0002)	0.6023	0.0009 (0.0003)	0.0006 (0.0003)	0.6056	0.0011 (0.0006)	0.0007 (0.0005)	0.0007 (0.0003)	0.0006 (0.0004)	0.7863
3488: G:Clostridium	0.0008 (0.0002)	0.0002 (0.0001)	0.0108	0.0007 (0.0002)	0.0003 (0.0001)	0.1057	0.0011 (0.0002)	0.0005 (0.0002)	0.0003 (0.0002)	0.0001 (0.0001)	0.3302
3736: G:Clostridium	0.0013 (0.0005)	0.0009 (0.0002)	0.4211	0.0014 (0.0005)	0.0008 (0.0002)	0.2637	0.0018 (0.0009)	0.0009 (0.0003)	0.0011 (0.0004)	0.0007 (0.0003)	0.6447
3763: G:Clostridium	0.0720 (0.0155)	0.0612 (0.0124)	0.5857	0.0784 (0.0146)	0.0547 (0.0122)	0.2418	0.0947 (0.0258)	0.0492 (0.0104)	0.0621 (0.0124)	0.0602 (0.0237)	0.2809
997: G:Eubacterium	0.0267 (0.0058)	0.0220 (0.0043)	0.4295	0.0195 (0.0044)	0.0291 (0.0053)	0.1236	0.0143 (0.0027)	0.0391 (0.0067)	0.0248 (0.0080)	0.0192 (0.0043)	0.022
2643: F:Incertae Sedis XIII	0.0014 (0.0003)	0.0017 (0.0007)	0.6712	0.0023 (0.0006)	0.0009 (0.0003)	0.0563	0.0017 (0.0004)	0.0012 (0.0005)	0.0028 (0.0011)	0.0006 (0.0003)	0.218
1509: G:Blautia	0.0012 (0.0005)	0.0003 (0.0002)	0.1241	0.0003 (0.0002)	0.0013 (0.0005)	0.0667	0.0005 (0.0003)	0.0019 (0.0009)	0.0000 (0.0000)	0.0007 (0.0004)	0.518
1727: G:Blautia	0.0010 (0.0003)	0.0001 (0.0001)	0.0191	0.0003 (0.0002)	0.0007 (0.0003)	0.2244	0.0006 (0.0004)	0.0013 (0.0005)	0.0000 (0.0000)	0.0001 (0.0001)	0.4225
2358: G:Blautia	0.0095 (0.0011)	0.0114 (0.0030)	0.4537	0.0138 (0.0025)	0.0070 (0.0011)	0.0196	0.0104 (0.0019)	0.0085 (0.0011)	0.0172 (0.0041)	0.0056 (0.0018)	0.0781
2899: G:Blautia	0.0018 (0.0008)	0.0014 (0.0005)	0.6441	0.0017 (0.0007)	0.0014 (0.0006)	0.7377	0.0026 (0.0012)	0.0009 (0.0009)	0.0008 (0.0005)	0.0019 (0.0007)	0.1544
3069: G:Blautia	0.0005 (0.0002)	0.0003 (0.0002)	0.5948	0.0005 (0.0002)	0.0003 (0.0001)	0.4694	0.0005 (0.0004)	0.0005 (0.0002)	0.0005 (0.0003)	0.0002 (0.0002)	0.6369
3159: G:Blautia	0.0010 (0.0003)	0.0014 (0.0007)	0.5356	0.0018 (0.0007)	0.0007 (0.0002)	0.1306	0.0011 (0.0006)	0.0009 (0.0003)	0.0025 (0.0012)	0.0004 (0.0001)	0.1898
3317: G:Blautia	0.0020 (0.0004)	0.0025 (0.0008)	0.6129	0.0024 (0.0008)	0.0020 (0.0004)	0.6931	0.0018 (0.0007)	0.0021 (0.0006)	0.0030 (0.0015)	0.0019 (0.0007)	0.4563
2207: F:Lachnospiraceae	0.0013 (0.0004)	0.0008 (0.0002)	0.3117	0.0010 (0.0004)	0.0011 (0.0004)	0.9147	0.0012 (0.0007)	0.0014 (0.0007)	0.0008 (0.0003)	0.0007 (0.0003)	0.7891
2348: F:Lachnospiraceae	0.0006 (0.0002)	0.0003 (0.0002)	0.4833	0.0002 (0.0002)	0.0007 (0.0002)	0.1494	0.0005 (0.0003)	0.0006 (0.0002)	0.0000 (0.0000)	0.0007 (0.0004)	0.3816
2461: F:Lachnospiraceae	0.0009 (0.0005)	0.0009 (0.0004)	0.9422	0.0014 (0.0005)	0.0004 (0.0002)	0.0827	0.0015 (0.0008)	0.0003 (0.0003)	0.0014 (0.0007)	0.0005 (0.0003)	0.7659
2549: F:Lachnospiraceae	0.0011 (0.0004)	0.0005 (0.0003)	0.251	0.0011 (0.0005)	0.0005 (0.0002)	0.296	0.0014 (0.0008)	0.0009 (0.0002)	0.0008 (0.0006)	0.0001 (0.0001)	0.9195
2808: F:Lachnospiraceae	0.0005 (0.0002)	0.0001 (0.0001)	0.0566	0.0004 (0.0002)	0.0002 (0.0001)	0.3651	0.0009 (0.0003)	0.0002 (0.0001)	0.0000 (0.0000)	0.0003 (0.0003)	0.0402
3183: F:Lachnospiraceae	0.0008 (0.0002)	0.0014 (0.0005)	0.2855	0.0008 (0.0003)	0.0014 (0.0005)	0.3739	0.0005 (0.0004)	0.0010 (0.0002)	0.0011 (0.0004)	0.0018 (0.0011)	0.8328
3453: F:Lachnospiraceae	0.0009 (0.0003)	0.0016 (0.0004)	0.1351	0.0012 (0.0004)	0.0013 (0.0002)	0.752	0.0003 (0.0002)	0.0015 (0.0005)	0.0020 (0.0007)	0.0012 (0.0002)	0.0387
1219: G:Coprococcus	0.0007 (0.0002)	0.0001 (0.0001)	0.0445	0.0003 (0.0002)	0.0004 (0.0002)	0.7232	0.0007 (0.0004)	0.0007 (0.0004)	0.0000 (0.0000)	0.0001 (0.0001)	0.9071
3247: G:Coprococcus	0.0026 (0.0005)	0.0019 (0.0006)	0.375	0.0024 (0.0004)	0.0021 (0.0006)	0.6771	0.0023 (0.0004)	0.0029 (0.0009)	0.0025 (0.0009)	0.0014 (0.0006)	0.2613
3553: G:Coprococcus	0.0004 (0.0002)	0.0001 (0.0001)	0.2161	0.0004 (0.0002)	0.0002 (0.0001)	0.346	0.0006 (0.0003)	0.0002 (0.0001)	0.0001 (0.0001)	0.0001 (0.0001)	0.3397
3710: G:Coprococcus	0.0021 (0.0007)	0.0019 (0.0005)	0.8846	0.0021 (0.0006)	0.0019 (0.0005)	0.7809	0.0017 (0.0010)	0.0024 (0.0010)	0.0025 (0.0009)	0.0013 (0.0004)	0.2912
4023: G:Coprococcus	0.0006 (0.0002)	0.0004 (0.0001)	0.5183	0.0006 (0.0002)	0.0004 (0.0001)	0.5639	0.0006 (0.0004)	0.0006 (0.0002)	0.0005 (0.0002)	0.0003 (0.0002)	0.7866
165: G:Dorea	0.0008 (0.0004)	0.0009 (0.0003)	0.7624	0.0007 (0.0003)	0.0010 (0.0003)	0.6227	0.0002 (0.0001)	0.0013 (0.0007)	0.0012 (0.0006)	0.0006 (0.0002)	0.0981
3063: G:Oribacterium	0.0030 (0.0005)	0.0042 (0.0008)	0.2171	0.0031 (0.0007)	0.0041 (0.0006)	0.2978	0.0028 (0.0009)	0.0032 (0.0007)	0.0034 (0.0012)	0.0050 (0.0010)	0.5501
1016: G:Pseudobutyrivibrio	0.0004 (0.0002)	0.0013 (0.0004)	0.0378	0.0004 (0.0003)	0.0014 (0.0004)	0.0179	0.0002 (0.0002)	0.0007 (0.0003)	0.0005 (0.0005)	0.0021 (0.0004)	0.1683
371: G:Roseburia	0.0036 (0.0014)	0.0017 (0.0005)	0.1402	0.0010 (0.0002)	0.0043 (0.0013)	0.0214	0.0014 (0.0004)	0.0058 (0.0023)	0.0007 (0.0001)	0.0027 (0.0007)	0.3371
2099: G:Roseburia	0.0114 (0.0036)	0.0061 (0.0011)	0.1191	0.0050 (0.0009)	0.0125 (0.0033)	0.0362	0.0057 (0.0012)	0.0171 (0.0060)	0.0043 (0.0013)	0.0078 (0.0013)	0.2407
3770: G:Peptococcus	0.0040 (0.0008)	0.0082 (0.0016)	0.036	0.0047 (0.0014)	0.0075 (0.0014)	0.1436	0.0025 (0.0006)	0.0055 (0.0012)	0.0070 (0.0024)	0.0095 (0.0023)	0.8801
38: F:Ruminococcaceae	0.0014 (0.0002)	0.0011 (0.0004)	0.5024	0.0008 (0.0001)	0.0016 (0.0004)	0.0897	0.0010 (0.0002)	0.0017 (0.0004)	0.0007 (0.0001)	0.0015 (0.0007)	0.9973
59: F:Ruminococcaceae	0.0012 (0.0003)	0.0013 (0.0004)	0.7685	0.0016 (0.0004)	0.0008 (0.0002)	0.1044	0.0015 (0.0004)	0.0008 (0.0003)	0.0018 (0.0007)	0.0008 (0.0003)	0.8139
105: F:Ruminococcaceae	0.0003 (0.0002)	0.0008 (0.0002)	0.101	0.0003 (0.0002)	0.0007 (0.0003)	0.2363	0.0000 (0.0000)	0.0005 (0.0004)	0.0007 (0.0003)	0.0009 (0.0004)	0.6289
324: F:Ruminococcaceae	0.0030 (0.0006)	0.0024 (0.0003)	0.4179	0.0022 (0.0004)	0.0032 (0.0005)	0.1812	0.0026 (0.0007)	0.0034 (0.0011)	0.0019 (0.0003)	0.0030 (0.0003)	0.864
355: F:Ruminococcaceae	0.0005 (0.0002)	0.0011 (0.0002)	0.0673	0.0006 (0.0002)	0.0010 (0.0001)	0.1127	0.0002 (0.0001)	0.0009 (0.0002)	0.0010 (0.0004)	0.0012 (0.0002)	0.4056
388: F:Ruminococcaceae	0.0005 (0.0001)	0.0016 (0.0004)	0.0199	0.0010 (0.0003)	0.0011 (0.0004)	0.8734	0.0006 (0.0003)	0.0004 (0.0002)	0.0015 (0.0004)	0.0018 (0.0007)	0.497
712: F:Ruminococcaceae	0.0009 (0.0003)	0.0012 (0.0003)	0.5122	0.0015 (0.0003)	0.0006 (0.0002)	0.0223	0.0012 (0.0005)	0.0007 (0.0003)	0.0018 (0.0003)	0.0006 (0.0002)	0.2795
753: F:Ruminococcaceae	0.0014 (0.0003)	0.0007 (0.0002)	0.1155	0.0009 (0.0003)	0.0012 (0.0003)	0.4836	0.0013 (0.0006)	0.0015 (0.0004)	0.0005 (0.0002)	0.0009 (0.0004)	0.8264
819: F:Ruminococcaceae	0.0005 (0.0001)	0.0001 (0.0001)	0.0258	0.0003 (0.0001)	0.0003 (0.0001)	0.8611	0.0004 (0.0002)	0.0005 (0.0002)	0.0001 (0.0001)	0.0000 (0.0000)	0.5501
885: F:Ruminococcaceae	0.0110 (0.0030)	0.0041 (0.0014)	0.0141	0.0032 (0.0012)	0.0119 (0.0028)	0.0037	0.0051 (0.0019)	0.0169 (0.0040)	0.0012 (0.0006)	0.0069 (0.0018)	0.2308
948: F:Ruminococcaceae	0.0075 (0.0008)	0.0062 (0.0014)	0.4689	0.0068 (0.0013)	0.0069 (0.0009)	0.9241	0.0073 (0.0011)	0.0077 (0.0012)	0.0062 (0.0026)	0.0062 (0.0014)	0.92
1007: F:Ruminococcaceae	0.0085 (0.0013)	0.0106 (0.0017)	0.2849	0.0073 (0.0016)	0.0119 (0.0009)	0.0287	0.0055 (0.0013)	0.0116 (0.0006)	0.0091 (0.0029)	0.0121 (0.0018)	0.4212
1100: F:Ruminococcaceae	0.0014 (0.0003)	0.0010 (0.0003)	0.4557	0.0011 (0.0003)	0.0013 (0.0003)	0.7594	0.0011 (0.0004)	0.0016 (0.0005)	0.0012 (0.0005)	0.0009 (0.0003)	0.3205
1233: F:Ruminococcaceae	0.0120 (0.0024)	0.0142 (0.0024)	0.5137	0.0152 (0.0031)	0.0111 (0.0010)	0.2405	0.0122 (0.0050)	0.0118 (0.0016)	0.0181 (0.0039)	0.0103 (0.0012)	0.2858
1316: F:Ruminococcaceae	0.0004 (0.0002)	0.0007 (0.0003)	0.4005	0.0004 (0.0002)	0.0007 (0.0002)	0.3608	0.0004 (0.0002)	0.0004 (0.0003)	0.0004 (0.0004)	0.0010 (0.0004)	0.3596
1572: F:Ruminococcaceae	0.0014 (0.0004)	0.0029 (0.0008)	0.139	0.0021 (0.0006)	0.0022 (0.0007)	0.9107	0.0013 (0.0008)	0.0015 (0.0002)	0.0028 (0.0008)	0.0029 (0.0014)	0.9445
1598: F:Ruminococcaceae	0.0009 (0.0002)	0.0015 (0.0002)	0.1152	0.0010 (0.0002)	0.0013 (0.0003)	0.4207	0.0009 (0.0003)	0.0009 (0.0004)	0.0012 (0.0004)	0.0017 (0.0003)	0.4648
1700: F:Ruminococcaceae	0.0024 (0.0006)	0.0046 (0.0008)	0.0704	0.0035 (0.0007)	0.0034 (0.0009)	0.9347	0.0025 (0.0007)	0.0023 (0.0012)	0.0046 (0.0012)	0.0045 (0.0012)	0.9509
2033: F:Ruminococcaceae	0.0012 (0.0004)	0.0006 (0.0003)	0.3813	0.0007 (0.0003)	0.0011 (0.0004)	0.5526	0.0011 (0.0005)	0.0012 (0.0008)	0.0004 (0.0004)	0.0009 (0.0005)	0.7569
2143: F:Ruminococcaceae	0.0006 (0.0002)	0.0009 (0.0005)	0.5693	0.0010 (0.0005)	0.0004 (0.0001)	0.287	0.0007 (0.0003)	0.0004 (0.0000)	0.0013 (0.0010)	0.0005 (0.0003)	0.5988
2289: F:Ruminococcaceae	0.0008 (0.0004)	0.0005 (0.0003)	0.6003	0.0008 (0.0005)	0.0005 (0.0003)	0.6523	0.0011 (0.0008)	0.0006 (0.0005)	0.0006 (0.0006)	0.0005 (0.0003)	0.7493
2393: F:Ruminococcaceae	0.0012 (0.0004)	0.0016 (0.0006)	0.6029	0.0014 (0.0003)	0.0015 (0.0006)	0.9129	0.0017 (0.0006)	0.0008 (0.0003)	0.0011 (0.0002)	0.0021 (0.0012)	0.1912
2467: F:Ruminococcaceae	0.0010 (0.0002)	0.0004 (0.0002)	0.06	0.0008 (0.0002)	0.0005 (0.0002)	0.241	0.0012 (0.0003)	0.0008 (0.0003)	0.0005 (0.0003)	0.0003 (0.0002)	0.8189
2743: F:Ruminococcaceae	0.0008 (0.0003)	0.0006 (0.0004)	0.6663	0.0006 (0.0003)	0.0007 (0.0004)	0.826	0.0011 (0.0006)	0.0004 (0.0002)	0.0001 (0.0001)	0.0010 (0.0007)	0.1131
2829: F:Ruminococcaceae	0.0009 (0.0004)	0.0008 (0.0003)	0.75	0.0005 (0.0003)	0.0012 (0.0003)	0.1884	0.0004 (0.0004)	0.0015 (0.0006)	0.0007 (0.0005)	0.0009 (0.0002)	0.4079
2898: F:Ruminococcaceae	0.0015 (0.0003)	0.0003 (0.0002)	0.009	0.0010 (0.0002)	0.0008 (0.0004)	0.7137	0.0014 (0.0002)	0.0015 (0.0006)	0.0005 (0.0003)	0.0001 (0.0001)	0.5176
3001: F:Ruminococcaceae	0.0005 (0.0002)	0.0003 (0.0002)	0.6231	0.0000 (0.0000)	0.0008 (0.0002)	0.01	0.0001 (0.0001)	0.0008 (0.0002)	0.0000 (0.0000)	0.0007 (0.0004)	0.9261
3134: F:Ruminococcaceae	0.0004 (0.0001)	0.0010 (0.0004)	0.1104	0.0010 (0.0004)	0.0004 (0.0001)	0.1201	0.0004 (0.0003)	0.0003 (0.0001)	0.0016 (0.0006)	0.0004 (0.0003)	0.1553
3154: F:Ruminococcaceae	0.0017 (0.0004)	0.0034 (0.0009)	0.117	0.0025 (0.0005)	0.0026 (0.0009)	0.9048	0.0023 (0.0006)	0.0012 (0.0005)	0.0027 (0.0010)	0.0041 (0.0016)	0.2415
3321: F:Ruminococcaceae	0.0007 (0.0003)	0.0008 (0.0002)	0.874	0.0006 (0.0003)	0.0009 (0.0003)	0.39	0.0006 (0.0005)	0.0009 (0.0005)	0.0006 (0.0004)	0.0010 (0.0003)	0.8109
3391: F:Ruminococcaceae	0.0021 (0.0005)	0.0009 (0.0005)	0.0678	0.0008 (0.0003)	0.0022 (0.0006)	0.0302	0.0015 (0.0003)	0.0027 (0.0009)	0.0000 (0.0000)	0.0018 (0.0007)	0.6322
3651: F:Ruminococcaceae	0.0015 (0.0004)	0.0019 (0.0006)	0.6407	0.0020 (0.0006)	0.0014 (0.0004)	0.4055	0.0019 (0.0005)	0.0012 (0.0005)	0.0022 (0.0012)	0.0016 (0.0005)	0.8977
3807: F:Ruminococcaceae	0.0003 (0.0001)	0.0013 (0.0003)	0.0071	0.0010 (0.0004)	0.0006 (0.0002)	0.2405	0.0002 (0.0001)	0.0003 (0.0002)	0.0018 (0.0005)	0.0008 (0.0003)	0.1187
3888: F:Ruminococcaceae	0.0015 (0.0004)	0.0022 (0.0006)	0.3949	0.0019 (0.0007)	0.0018 (0.0004)	0.9167	0.0011 (0.0005)	0.0019 (0.0007)	0.0027 (0.0012)	0.0017 (0.0005)	0.2916
4047: F:Ruminococcaceae	0.0022 (0.0003)	0.0023 (0.0008)	0.9169	0.0016 (0.0004)	0.0028 (0.0007)	0.2018	0.0019 (0.0005)	0.0024 (0.0004)	0.0013 (0.0006)	0.0032 (0.0015)	0.462
4198: F:Ruminococcaceae	0.0013 (0.0004)	0.0020 (0.0009)	0.4768	0.0014 (0.0009)	0.0020 (0.0004)	0.5522	0.0005 (0.0003)	0.0021 (0.0002)	0.0022 (0.0017)	0.0018 (0.0008)	0.3289
455: G:Butyricicoccus	0.0111 (0.0043)	0.0080 (0.0022)	0.4793	0.0046 (0.0011)	0.0145 (0.0039)	0.0377	0.0048 (0.0021)	0.0174 (0.0073)	0.0044 (0.0010)	0.0116 (0.0036)	0.5372
1660: G:Butyricicoccus	0.0044 (0.0018)	0.0013 (0.0009)	0.1481	0.0040 (0.0019)	0.0017 (0.0007)	0.274	0.0063 (0.0033)	0.0025 (0.0012)	0.0017 (0.0017)	0.0010 (0.0007)	0.4388
2126: G:Butyricicoccus	0.0009 (0.0003)	0.0001 (0.0001)	0.0128	0.0003 (0.0002)	0.0007 (0.0003)	0.1668	0.0005 (0.0003)	0.0012 (0.0004)	0.0001 (0.0001)	0.0001 (0.0001)	0.1667
3880: G:Butyricicoccus	0.0012 (0.0005)	0.0008 (0.0003)	0.5279	0.0006 (0.0001)	0.0014 (0.0005)	0.1443	0.0006 (0.0002)	0.0017 (0.0009)	0.0005 (0.0002)	0.0011 (0.0005)	0.6456
632: G:Faecalibacterium	0.0011 (0.0004)	0.0012 (0.0003)	0.8353	0.0008 (0.0003)	0.0014 (0.0004)	0.2021	0.0003 (0.0002)	0.0018 (0.0007)	0.0012 (0.0004)	0.0011 (0.0005)	0.1354
1009: G:Faecalibacterium	0.0180 (0.0028)	0.0247 (0.0069)	0.3972	0.0230 (0.0062)	0.0197 (0.0044)	0.6684	0.0154 (0.0023)	0.0206 (0.0052)	0.0306 (0.0117)	0.0188 (0.0080)	0.2873
1763: G:Faecalibacterium	0.0030 (0.0004)	0.0036 (0.0009)	0.5555	0.0033 (0.0008)	0.0034 (0.0005)	0.9623	0.0027 (0.0006)	0.0034 (0.0005)	0.0040 (0.0016)	0.0033 (0.0010)	0.5419
288: G:Oscillibacter	0.0002 (0.0001)	0.0002 (0.0001)	0.9792	0.0002 (0.0001)	0.0002 (0.0001)	0.7428	0.0002 (0.0001)	0.0002 (0.0001)	0.0003 (0.0003)	0.0002 (0.0002)	0.8688
1261: G:Oscillibacter	0.0009 (0.0002)	0.0006 (0.0003)	0.3533	0.0005 (0.0003)	0.0010 (0.0002)	0.1549	0.0008 (0.0005)	0.0009 (0.0002)	0.0001 (0.0001)	0.0010 (0.0004)	0.2615
1526: G:Oscillibacter	0.0004 (0.0001)	0.0006 (0.0002)	0.5137	0.0005 (0.0001)	0.0006 (0.0002)	0.8106	0.0003 (0.0002)	0.0006 (0.0002)	0.0007 (0.0001)	0.0006 (0.0004)	0.5289
3690: G:Oscillibacter	0.0002 (0.0001)	0.0008 (0.0003)	0.0697	0.0004 (0.0002)	0.0006 (0.0003)	0.5964	0.0001 (0.0001)	0.0002 (0.0001)	0.0007 (0.0003)	0.0009 (0.0005)	0.9112
3822: G:Oscillibacter	0.0058 (0.0008)	0.0115 (0.0018)	0.0188	0.0082 (0.0018)	0.0091 (0.0018)	0.6613	0.0056 (0.0011)	0.0059 (0.0014)	0.0107 (0.0030)	0.0123 (0.0024)	0.7804
4115: G:Oscillibacter	0.0003 (0.0002)	0.0006 (0.0002)	0.3048	0.0003 (0.0001)	0.0006 (0.0002)	0.2298	0.0000 (0.0000)	0.0006 (0.0004)	0.0005 (0.0002)	0.0006 (0.0003)	0.3458
1051: G:Ruminococcus	0.0012 (0.0005)	0.0010 (0.0004)	0.7768	0.0012 (0.0004)	0.0010 (0.0005)	0.7758	0.0010 (0.0005)	0.0014 (0.0010)	0.0014 (0.0008)	0.0006 (0.0002)	0.39
2148: G:Ruminococcus	0.0052 (0.0015)	0.0035 (0.0005)	0.2937	0.0054 (0.0014)	0.0034 (0.0007)	0.2091	0.0073 (0.0025)	0.0030 (0.0011)	0.0034 (0.0008)	0.0037 (0.0008)	0.1435
2277: G:Ruminococcus	0.0010 (0.0003)	0.0020 (0.0005)	0.1223	0.0017 (0.0006)	0.0013 (0.0003)	0.4917	0.0009 (0.0004)	0.0011 (0.0003)	0.0026 (0.0009)	0.0015 (0.0005)	0.2714
3095: G:Ruminococcus	0.0006 (0.0002)	0.0002 (0.0002)	0.2061	0.0003 (0.0001)	0.0006 (0.0003)	0.3027	0.0006 (0.0001)	0.0007 (0.0005)	0.0000 (0.0000)	0.0005 (0.0003)	0.6351
3197: G:Ruminococcus	0.0042 (0.0010)	0.0055 (0.0016)	0.5212	0.0051 (0.0015)	0.0046 (0.0013)	0.8169	0.0036 (0.0012)	0.0049 (0.0019)	0.0066 (0.0026)	0.0044 (0.0020)	0.3947
3877: G:Ruminococcus	0.0019 (0.0004)	0.0024 (0.0007)	0.5393	0.0029 (0.0006)	0.0014 (0.0004)	0.0579	0.0023 (0.0005)	0.0015 (0.0006)	0.0035 (0.0010)	0.0013 (0.0007)	0.3579
3911: G:Ruminococcus	0.0002 (0.0001)	0.0004 (0.0002)	0.5165	0.0003 (0.0001)	0.0003 (0.0002)	0.873	0.0002 (0.0001)	0.0003 (0.0003)	0.0004 (0.0003)	0.0004 (0.0003)	0.9218
4011: G:Ruminococcus	0.0003 (0.0001)	0.0003 (0.0002)	0.9837	0.0003 (0.0002)	0.0002 (0.0001)	0.7594	0.0002 (0.0002)	0.0003 (0.0002)	0.0004 (0.0004)	0.0001 (0.0001)	0.53
4088: G:Sporobacter	0.0009 (0.0003)	0.0005 (0.0002)	0.1051	0.0003 (0.0001)	0.0011 (0.0003)	0.0182	0.0005 (0.0002)	0.0014 (0.0004)	0.0001 (0.0001)	0.0008 (0.0003)	0.7023
4120: G:Sporobacter	0.0022 (0.0006)	0.0013 (0.0005)	0.1736	0.0008 (0.0003)	0.0027 (0.0005)	0.0066	0.0010 (0.0005)	0.0033 (0.0007)	0.0005 (0.0004)	0.0021 (0.0007)	0.5571
1477: G:Subdoligranulum	0.0152 (0.0041)	0.0267 (0.0061)	0.127	0.0204 (0.0058)	0.0215 (0.0055)	0.8771	0.0084 (0.0024)	0.0220 (0.0065)	0.0324 (0.0073)	0.0210 (0.0098)	0.1014
211: F:Veillonellaceae	0.0041 (0.0005)	0.0069 (0.0011)	0.0374	0.0062 (0.0007)	0.0048 (0.0011)	0.2624	0.0051 (0.0007)	0.0030 (0.0004)	0.0072 (0.0011)	0.0065 (0.0020)	0.5857
1906: F:Veillonellaceae	0.0003 (0.0002)	0.0011 (0.0006)	0.1735	0.0000 (0.0000)	0.0014 (0.0006)	0.0284	0.0000 (0.0000)	0.0006 (0.0004)	0.0000 (0.0000)	0.0022 (0.0010)	0.1735
2837: F:Veillonellaceae	0.0011 (0.0005)	0.0004 (0.0002)	0.1427	0.0003 (0.0002)	0.0012 (0.0004)	0.0625	0.0004 (0.0004)	0.0019 (0.0007)	0.0003 (0.0003)	0.0006 (0.0002)	0.1985
4024: F:Veillonellaceae	0.0014 (0.0004)	0.0014 (0.0004)	0.9645	0.0017 (0.0004)	0.0010 (0.0003)	0.1475	0.0019 (0.0005)	0.0009 (0.0005)	0.0016 (0.0007)	0.0011 (0.0004)	0.6747
3840: G:Megasphaera	0.0024 (0.0006)	0.0037 (0.0008)	0.2649	0.0031 (0.0007)	0.0030 (0.0008)	0.9369	0.0023 (0.0009)	0.0024 (0.0009)	0.0038 (0.0011)	0.0035 (0.0014)	0.8576
2159: G:Mitsuokella	0.0018 (0.0008)	0.0071 (0.0033)	0.0493	0.0004 (0.0002)	0.0085 (0.0030)	0.0063	0.0003 (0.0002)	0.0033 (0.0011)	0.0006 (0.0004)	0.0137 (0.0047)	0.0598
347: F:Erysipelotrichaceae	0.0002 (0.0001)	0.0001 (0.0001)	0.8339	0.0002 (0.0001)	0.0001 (0.0001)	0.6581	0.0002 (0.0002)	0.0001 (0.0001)	0.0001 (0.0001)	0.0001 (0.0001)	0.6459
2024: F:Erysipelotrichaceae	0.0065 (0.0023)	0.0148 (0.0042)	0.1105	0.0140 (0.0036)	0.0073 (0.0035)	0.1955	0.0099 (0.0039)	0.0030 (0.0013)	0.0180 (0.0059)	0.0116 (0.0065)	0.9637
2732: F:Erysipelotrichaceae	0.0026 (0.0008)	0.0028 (0.0008)	0.8615	0.0016 (0.0006)	0.0038 (0.0008)	0.045	0.0007 (0.0002)	0.0045 (0.0005)	0.0025 (0.0011)	0.0030 (0.0015)	0.1142
3039: F:Erysipelotrichaceae	0.0009 (0.0003)	0.0024 (0.0007)	0.0772	0.0016 (0.0007)	0.0017 (0.0005)	0.8704	0.0004 (0.0003)	0.0013 (0.0004)	0.0027 (0.0012)	0.0021 (0.0010)	0.4097
3387: F:Erysipelotrichaceae	0.0007 (0.0002)	0.0014 (0.0004)	0.1958	0.0010 (0.0003)	0.0011 (0.0004)	0.8713	0.0007 (0.0004)	0.0006 (0.0004)	0.0012 (0.0004)	0.0015 (0.0008)	0.6805
1460: G:Bulleidia	0.0005 (0.0002)	0.0006 (0.0003)	0.8702	0.0009 (0.0002)	0.0002 (0.0001)	0.0329	0.0010 (0.0002)	0.0001 (0.0001)	0.0008 (0.0005)	0.0003 (0.0002)	0.5459
2687: G:Bulleidia	0.0029 (0.0005)	0.0039 (0.0005)	0.1824	0.0033 (0.0004)	0.0035 (0.0006)	0.8329	0.0030 (0.0004)	0.0028 (0.0010)	0.0037 (0.0008)	0.0041 (0.0005)	0.6964
2213: G:Catenibacterium	0.0764 (0.0280)	0.0511 (0.0084)	0.4027	0.0811 (0.0266)	0.0464 (0.0102)	0.2563	0.1057 (0.0517)	0.0470 (0.0199)	0.0565 (0.0148)	0.0458 (0.0097)	0.4256
4125: G:Turicibacter	0.0058 (0.0012)	0.0012 (0.0004)	0.0046	0.0035 (0.0014)	0.0035 (0.0011)	0.9772	0.0059 (0.0021)	0.0057 (0.0015)	0.0010 (0.0007)	0.0014 (0.0003)	0.8423
539: G:Treponema	0.0051 (0.0033)	0.0013 (0.0011)	0.3316	0.0033 (0.0030)	0.0031 (0.0020)	0.9684	0.0063 (0.0060)	0.0039 (0.0037)	0.0003 (0.0003)	0.0024 (0.0022)	0.5549
1085: G:Treponema	0.0007 (0.0002)	0.0010 (0.0002)	0.3437	0.0008 (0.0002)	0.0008 (0.0002)	0.9175	0.0007 (0.0003)	0.0006 (0.0003)	0.0009 (0.0004)	0.0010 (0.0001)	0.6862
2346: G:Treponema	0.0023 (0.0009)	0.0018 (0.0003)	0.601	0.0026 (0.0008)	0.0015 (0.0003)	0.2789	0.0032 (0.0016)	0.0014 (0.0005)	0.0019 (0.0006)	0.0016 (0.0004)	0.4095
4055: G:Treponema	0.0172 (0.0083)	0.0077 (0.0025)	0.2738	0.0174 (0.0083)	0.0075 (0.0023)	0.2596	0.0277 (0.0155)	0.0067 (0.0032)	0.0070 (0.0039)	0.0083 (0.0038)	0.2062
